Contributions of phenotypic plasticity to differences in thermogenic performance between highland and lowland deer mice.

Zachary A. Cheviron<sup>1‡\*</sup>, Gwendolyn C. Bachman<sup>1</sup>, and Jay F. Storz<sup>1</sup>

<sup>1</sup>School of Biological Sciences, University of Nebraska, Lincoln NE, 68588, USA

<sup>‡</sup>Department of Animal Biology, School of Integrative Biology, University of Illinois, Urbana-Champaign, Urbana IL, 61801, USA

\*Author for correspondence ([cheviron@illinois.edu](mailto:cheviron@illinois.edu))

Short title: Phenotypic plasticity and thermogenic performance

Key words: developmental plasticity, high-altitude adaptation, hypoxia, *Peromyscus*, thermoregulation

18   **Summary**

19   Small mammals face especially severe thermoregulatory challenges at high-  
20   altitude because the reduced O<sub>2</sub> availability constrains the capacity for aerobic  
21   thermogenesis. Adaptive enhancement of thermogenic performance under  
22   hypoxic conditions may be achieved via physiological adjustments that occur  
23   within the lifetime of individuals (phenotypic plasticity) and/or genetically  
24   based changes that occur across generations, but their relative contributions to  
25   performance differences between highland and lowland natives is unclear.  
26   Here, we examined potentially evolved differences in thermogenic  
27   performance between populations of deer mice (*Peromyscus maniculatus*) that  
28   are native to different altitudes. The purpose of the study was to assess the  
29   contribution of phenotypic plasticity to population differences in thermogenic  
30   performance under hypoxia. We used a common-garden deacclimation  
31   experiment to demonstrate that highland deer mice have enhanced  
32   thermogenic capacities under hypoxia, and that performance differences  
33   between highland and lowland mice persist when individuals are born and  
34   reared under common-garden conditions, suggesting that differences in  
35   thermogenic capacity have a genetic basis. Conversely, population differences  
36   in thermogenic endurance appear to be entirely attributable to physiological  
37   plasticity during adulthood. These combined results reveal distinct sources of  
38   phenotypic plasticity for different aspects of thermogenic performance, and  
39   suggest that thermogenic capacity and endurance may have different  
40   mechanistic underpinnings.

## INTRODUCTION

For small homeothermic endotherms, the capacity for metabolic heat production is a primary determinant of survival during periods of prolonged cold stress (Conley and Porter, 1986; Hayes and O'Connor, 1999). Like many complex phenotypic traits, changes in thermogenic performance can be achieved via physiological adjustments that occur within the lifetime of individuals (phenotypic plasticity) and/or genetically based changes that occur across generations (genetic adaptation) (Garland and Carter, 1994; Rezende *et al*, 2001; Hammond *et al*, 2002; Storz *et al*, 2010b; Swanson, 2010). Quantitative genetic studies have demonstrated that thermogenic capacity and similar measures of whole-organism metabolic performance have a heritable basis (Swallow *et al*, 1998; Dohm *et al*, 2001; Nespolo *et al*, 2003; Fontanillas *et al*, 2005; Nespolo *et al*, 2005; Sadowska *et al*, 2005; Wone *et al*, 2009), indicating that evolutionary changes in such traits could be brought about by directional selection. However, many changes in whole-organism metabolic performance could also occur through reversible physiological adjustments. For example, temperate-zone birds and mammals often exhibit marked changes in thermogenic capacity and cold hardiness with the onset of winter (Merritt, 1995; Liknes and Swanson, 1996; Liknes *et al*, 2002; Swanson, 2007; Swanson, 2010; Oelkrug *et al*, 2012). Changes in thermogenic performance can also be induced by environmental conditions experienced during prenatal development (Chappell *et al*, 2007; Russell *et al*, 2008), and in contrast to reversible acclimatization responses, the effects of developmental plasticity may persist throughout postnatal life (Dzialowski *et al*, 2001; Chappell *et al*, 2007; Russell *et al*, 2008). Thus, a central goal of research in evolutionary physiology is to assess the relative contributions of genotypic specialization and phenotypic plasticity in enabling species to cope with changing environmental conditions (Garland and Adolph, 1991; Garland and

Carter, 1994; Kingslover and Huey, 1998; Feder *et al*, 2000; Storz *et al*, 2010b). Studies of altitude-related variation in aerobic thermogenic performance are particularly well-suited to this goal because ambient temperature and oxygen availability vary predictably as a function of altitude.

The deer mouse (*Peromyscus maniculatus*) has emerged as a particularly promising study organism for investigations of high-altitude adaptation. This is largely due to the fact that deer mice have the broadest altitudinal distribution of any North American mammal, occurring above 4300 m in mountain ranges of western North America to below sea-level in Death Valley, California (Hock, 1964). Deer mice also do not hibernate (Jones *et al* 1983), and as a result, they are highly dependent on aerobic thermogenesis to maintain a constant body temperature during periods of prolonged cold stress (Chappell and Hammond 2004). Because hypoxia can potentially constrain the metabolic scope for aerobic activity, deer mice face especially severe thermoregulatory challenges in cold, alpine and subalpine environments. Indeed, survivorship studies of free-ranging mice at high-altitude have documented strong directional selection on thermogenic capacity (Hayes and O'Connor, 1999), and thermogenic performance is strongly correlated with above-ground activity and foraging behavior in the cold (Sears *et al*, 2006; Sears *et al*, 2009). Thus, in high-altitude deer mice, thermogenic performance under hypoxia is clearly an ecologically-important trait that has a well-documented connection to Darwinian fitness (Hayes and O'Connor, 1999).

Most previous studies of environmental effects on aerobic performance and hypoxia tolerance in deer mice have focused on interindividual variation among mice collected from a single geographic locality (Chappell, 1985; Hammond *et al*, 2002; Chappell and Hammond, 2004; Chappell *et al*, 2007; Russell and Chappell, 2007; Russell *et al*, 2008; Van Sant and Hammond, 2008;

Rezende *et al*, 2009). Given that deer mice have such a broad altitudinal distribution, it is also of interest to assess the contribution of phenotypic plasticity to population differences in physiological traits that have distinct local optima in different elevational zones. Thus, the purpose of the present study was to assess the contribution of phenotypic plasticity to altitude-related population differences in thermogenic performance under hypoxia.

We used a common-garden deacclimation experiment to characterize the effects of environmental variation during pre- and post-natal life on two aspects of whole-organism thermogenic performance under hypoxia: thermogenic capacity and thermogenic endurance. We show that deer mice that are native to high altitude have elevated thermogenic capacities under hypoxia compared to those that are native to low altitude, and that these differences persist in mice that are born and reared under common-garden conditions, suggesting that they have a genetic basis. Conversely, differences in thermogenic endurance between highland and lowland deer mice appear to be entirely attributable to environmental effects that act during adulthood. These results reveal distinct sources of phenotypic plasticity for different aspects of thermogenic performance, and suggest that thermogenic capacity and endurance may have different mechanistic underpinnings.

# **MATERIALS AND METHODS**

## **Experimental animals and deacclimation treatments**

Adult deer mice were live trapped at one high-altitude locality in the Southern Rocky Mountains, the summit of Mt. Evans, Clear Creek Co., Colorado, USA (39° 35' 18" N, 105° 38' 38" W, 4350 m a.s.l.,  $PO_2 \sim 95.6$  mmHg ) and one low-altitude locality in the Great Plains, 9-mile prairie; Lancaster Co, NE, USA (40° 52' 12" N, 96° 48' 20.3" W, 430 m a.s.l.,  $PO_2 \sim 152.0$  mmHg). This pair of high- and low-

altitude localities is separated by a linear distance of 770 km. Following capture, high- and low-altitude deer mice were either measured on-site within one to two days of capture [*in-situ* treatment; highland mice, n = 10; lowland mice, n = 10] or they were transferred from collection localities to a common-garden lab environment at the animal research facility at the University of Nebraska, Lincoln, NE (elevation 360 m,  $PO_2 \sim 153.3$  mmHg). Mice that were transferred to the common-garden lab environment were assigned to one of two groups. Mice in the first group (highland mice, n = 10; lowland mice, n = 10) were housed for 6 wks with a constant ambient temperature (25°C) and light:dark cycle (12L:12D). We measured the thermogenic performance of all mice at the conclusion of this 6-wk deacclimation period. Mice assigned to the second group were used as parental stock to produce F<sub>1</sub> progeny that were born and reared in the common garden. Once these F<sub>1</sub> progeny reached adulthood (75 - 90 days), we measured thermogenic capacity under hypoxia in 10 full-sibling progeny from a pair of highland parents and 10 full-sibling progeny from a pair of lowland parents. This experimental design allowed us to control for two distinct sources of phenotypic plasticity in thermogenic performance, physiological plasticity during adulthood (through the comparison of wild-caught high- and low-altitude mice that underwent the 6-wk deacclimation under common garden conditions) and developmental plasticity (through comparison of the F<sub>1</sub> progeny of wild-caught high- and low-altitude mice that were born and reared under common garden conditions). Differences in thermogenic performance that persisted in the F<sub>1</sub> mice were assumed to represent genetically-based differences in thermogenic performance between highland and lowland mice.

## Respirometry

We used open-flow respirometry to measure thermogenic capacity as the maximum rate of oxygen consumption ( $\text{VO}_{2\text{ max}}$ ) elicited by cold-exposure. The measurements performed in Lincoln were made in a hypoxic heliox atmosphere (12.6%  $\text{O}_2$ , 87.4% He), which simulates the atmospheric  $\text{PO}_2$  on the summit of Mt. Evans. For the measurements made on the summit of Mt. Evans, we used a normoxic heliox atmosphere (21%  $\text{O}_2$ ; 79% He). At both localities, heliox gas mixtures were equilibrated to local atmospheric pressure so that all of the experimental animals experienced an equivalent level of hypoxia during the thermogenic trials. The incurrent flow rate of heliox was approximately 450ml/min after correction (see below). All of the trials were conducted at ambient temperatures just below freezing (minimum  $-4^\circ\text{C}$ ). Rates of heat loss in heliox are several times greater than in ambient air, which makes it possible to elicit  $\text{VO}_{2\text{ max}}$  without risking cold injury to experimental animals (Rosenmann and Morrison, 1974). Similar protocols have been used to elicit  $\text{VO}_{2\text{ max}}$  in *P. maniculatus* in previous studies (Chappell and Hammond, 2004; Rezende *et al*, 2004; Cheviron *et al*, 2012). Heliox mixtures were obtained from a commercial supplier (Linweld, Lincoln, NE).

The respirometry setup for the thermogenic trials was identical to that described by Cheviron *et al*. (2012). Briefly, heliox gas mixtures were first equilibrated to atmospheric pressure, and were then pumped into copper coils inside a temperature control chamber using mass flow controllers (Sable Systems Inc, Las Vegas, NV). The cooled heliox was then pumped into the animal chamber and a baseline (empty) chamber at a rate of approximately 450 mL/min. The animal and baseline chambers were constructed of thin, airtight polypropylene with an internal volume of 180 mL, which minimized locomotion but still permitted postures normally adopted for shivering. We verified that the temperature inside the temperature control chamber was identical to that

experienced by a mouse inside the animal chamber by using a thermocouple to measure excurrent air at the junction of the excurrent tube and the animal chamber. Excurrent air from the animal and baseline chambers was sampled at a rate of approximately 130 mL/min; the air was dried with magnesium perchlorate, passed through a CO<sub>2</sub> analyzer (CO<sub>2</sub> data reported elsewhere, Cheviron et al. 2012), scrubbed of CO<sub>2</sub> with ascarite, redried with drierite, and passed through an oxygen analyzer (Sable Systems Inc. FoxBox). We monitored excurrent O<sub>2</sub> continuously, and each experimental animal was removed when values showed clear indications of dropping to baseline. We used a rectal thermometer to measure the body temperature of each mouse following the thermogenic trials, and we confirmed that all experimental mice were hypothermic when removed from the chamber. The O<sub>2</sub> analyzer was spanned daily with ambient air.

We calculated VO<sub>2</sub> using equation 10.1 in Lighton (2008). Gas conversion factors for two-gas mixtures (helium and oxygen) were calculated, and applied to the flow data prior to VO<sub>2</sub> calculations. We measured thermogenic capacity (VO<sub>2 max</sub>) as the maximum VO<sub>2</sub> averaged over a continuous 5 min period, and we measured thermogenic endurance as the length of time (min) that individuals maintained  $\geq 90\%$  of VO<sub>2 max</sub> during the thermogenic trials. All experimental protocols were approved by the University of Nebraska Institutional Animal Care and Use Committee (IACUC #522).

# **Statistics**

We tested for differences in body mass between populations and across the deacclimation treatments using a two-way ANOVA design. Body mass varied significantly among the six experimental groups, and was significantly correlated with VO<sub>2 max</sub> (see Results). To control for the effects of body mass on thermogenic



capacity ( $\text{VO}_{2\text{ max}}$ ), we tested for mean differences in thermogenic capacity between samples of highland and lowland deer mice across deacclimation treatments using a two-way ANCOVA design with body mass as a covariate (Packard and Boardman 1988). In contrast to thermogenic capacity, thermogenic endurance was not correlated with body mass, and as result, we used a two-way ANOVA design to test for differences in thermogenic endurance. Upon detection of significant ANCOVA and ANOVA main effects, we performed *post hoc* Tukey HSD tests to identify significant pairwise differences between populations and treatments. Finally, we used linear regression to assess the relationship between thermogenic capacity and endurance in each of the experimental groups (*in situ*, 6-wk deacclimation,  $F_1$  progeny of deacclimated mice). Consistent with previous studies of thermogenic performance in deer mice (Chappell *et al*, 2007), sex had no effect on either thermogenic capacity or endurance (data not shown). Thus, both sexes were combined in all analyses. All statistical analyses were performed in either R or JMP 501.

## RESULTS

There was significant variation in body mass among experimental groups (Tables 1 and 2). The highland mice were significantly larger in the *in-situ* group, and this difference persisted in the six –week deacclimated group, although it was not statistically significant (Table 1). Interestingly, this relationship was reversed in the  $F_1$  mice, with the lowland mice being significantly larger than highlanders, which resulted in a significant population x treatment interaction (Table 2). This reversal likely reflects sampling error; it is not attributable to biased sex ratios in the population samples, as we measured equal numbers of  $F_1$  males ( $n=5/\text{group}$ ) and females ( $n=5/\text{group}$ ). Variation in body mass was also significantly correlated with thermogenic capacity (uncorrected  $\text{VO}_{2\text{ max}}$  values)

( $r^2 = 0.081$ ,  $p = 0.028$ ), but not thermogenic endurance ( $r^2 = 0.006$ ,  $p = 0.57$ ). Thus, we statistically controlled for body mass by using an ANCOVA design in the analysis of thermogenic capacity. We did not correct for body mass in the analysis of thermogenic endurance.

There were significant differences in thermogenic capacity between high- and low-altitude mice (ANCOVA  $F_{1,59} = 60.17$ ,  $p = 2.74 \times 10^{-10}$ ; Table 3) and among treatment groups (ANCOVA  $F_{2,58} = 21.46$ ,  $p = 1.49 \times 10^{-10}$ ; Table 3). Within each experimental group (*In-situ*, 6-wk deacclimation, and  $F_1$ ), highland deer mice had significantly higher thermogenic capacities than their lowland counterparts (Fig. 1a), but the proportional difference in thermogenic capacity between highland and lowland mice increased across the deacclimation treatments (Fig 1b). Specifically, the proportional difference in thermogenic capacity was greatest in the high- vs. low-altitude comparison between the lab-reared  $F_1$  progeny of wild-caught mice, and smallest in comparisons between highland and lowland mice that were tested at the site of capture.

However, within population samples, thermogenic capacity decreased across the three treatments, demonstrating that thermogenic capacity is highly plastic. The interaction between population of origin and treatment was not significant ( $F_{2,58} = 0.59$ ,  $p = 0.56$ ) (Table 1), indicating that the decline in thermogenic capacity across the three treatments was qualitatively similar for highland and lowland mice (Fig. 1b).

We found a fundamentally different pattern for thermogenic endurance. Although both population of origin (ANOVA  $F_{1,59} = 22.03$ ,  $p = 1.87 \times 10^{-5}$ ) and acclimation treatment (ANOVA  $F_{1,59} = 15.4$ ,  $p = 5.01 \times 10^{-6}$ ) also had significant effects on endurance (Table 2), this result was largely driven by differences between the *in situ* groups. After the 6-wk deacclimation period, the difference in thermogenic endurance between the highland and lowland deer mice essentially

disappeared (Fig. 2). Thus, in contrast to thermogenic capacity, the difference in thermogenic endurance between the *in situ* highland and lowland mice appears to be entirely attributable to physiological plasticity during adulthood.

In contrast to the deacclimation changes in thermogenic capacity, the highland and lowland mice exhibited distinct patterns of change in thermogenic endurance across the three experimental treatments, as indicated by a significant population  $\times$  treatment interaction ( $F_{2, 58} = 14.36$ ;  $p = 1 \times 10^{-5}$ ) (Table 2). In the highland mice, thermogenic endurance decreased steadily across treatments (Fig 2a). By contrast, endurance in the lowland 6-wk deacclimation group was slightly higher than both the lowland *in situ* and lowland F<sub>1</sub> groups, although this difference was not significant.

For the *in situ* mice, thermogenic capacity was strongly and positively correlated with thermogenic endurance ( $r^2 = 0.44$ ,  $p = 0.001$ ) (Fig. 3). Although this correlation approached significance in the 6-week deacclimation group ( $r^2 = 0.17$ ,  $p = 0.063$ ), there was no relationship between thermogenic capacity and endurance for the F<sub>1</sub> mice ( $r^2 = 0.03$ ;  $p = 0.467$ ). This pattern mainly reflects the strong influence of environmental effects on thermogenic endurance, and it demonstrates that there is no ineluctable functional linkage between thermogenic capacity and endurance.

# DISCUSSION

Thermogenic capacity and endurance are constrained by the reduced  $PO_2$  at high altitude (Hayes, 1989; Ward *et al*, 1995; Chappell and Hammond, 2004), and this hypoxic challenge can be offset through a combination of genetic adaptation, physiological plasticity and/or developmental plasticity. Our experiments were designed to assess the contribution of phenotypic plasticity to population differences in thermogenic performance under hypoxia, and to distinguish

between physiological adjustments that occur during adulthood and prenatal development.

Results from our experiments on the *in situ* groups revealed that highland deer mice have greater overall thermogenic capacities and endurances under hypoxia relative to lowland deer mice (*in situ* groups; Figs. 1 and 2). The common-garden deacclimation experiment revealed that although a fraction of the *in situ* performance differences in both thermogenic capacity and endurance could be attributed to phenotypic plasticity, the relative contributions and sources of plasticity were different for each of the two traits. Thermogenic capacity decreased across the three treatments, but trait values for the highland mice were significantly higher than those of the lowland mice in each treatment (Fig 1a). These results suggest that differences in thermogenic capacity have a genetic basis, but the upper limits of capacity are affected by environmental influences during both pre- and post-natal life.

In contrast to thermogenic capacity, the *in situ* differences in thermogenic endurance were no longer evident after the six-week deacclimation period, suggesting that the elevated thermogenic endurance of highland deer mice is largely attributable to acclimatization to hypoxic cold stress during adulthood. Although aerobic capacity and endurance tend to be positively correlated in animals (Bennett, 1991), the mechanistic link between these two performance measures is unclear. Like total aerobic capacity, thermogenic capacity appears to be generally correlated with measures of thermogenic endurance in birds (Swanson, 2001; Swanson and Liknes, 2006; Swanson and Garland, 2009). The relationship between thermogenic capacity and endurance is less well-studied in mammals, but there is some evidence for a positive correlation between maximal aerobic capacity and exercise endurance in rodents (Bennett, 1991; Rezende *et al*,

2006). Our results suggest that under hypoxic conditions, this correlation is at least partially dependent on acclimation history (Fig. 3).

Given the observed differences in the plasticity of thermogenic capacity and thermogenic endurance under hypoxia, our results also suggest that these performance measures may have different mechanistic underpinnings. A number of factors are known to contribute to thermogenic capacity under hypoxia in deer mice. These include the relative sizes of thermogenic and respiratory organs (Rezende *et al*, 2009), differences in ventilatory traits (Rezende *et al*, 2004), blood-oxygen transport (Chappell and Snyder, 1984; Chappell *et al*, 1988; Hammond *et al*, 2001; Hammond *et al*, 2002), and the capacity for lipid oxidation (Cheviron *et al*, 2012). Although each of these traits displays a degree of phenotypic plasticity, blood-O<sub>2</sub> transport is associated with genetic differences in hemoglobin- O<sub>2</sub> affinity (Snyder *et al*, 1982; Chappell and Snyder, 1984; Snyder, 1985; Chappell *et al*, 1988; Storz *et al*, 2007; Storz *et al*, 2009; Storz *et al*, 2010a), and population differences in the capacity for metabolizing lipid fuels between highland and lowland deer mice persist for at least 6 wks of low-altitude deacclimation (Cheviron *et al*, 2012). Thus, genetically-based differences in hemoglobin function and metabolic capacities may contribute to the consistently elevated thermogenic capacities of high-altitude deer mice.

The mechanistic underpinnings of thermogenic endurance has received less empirical attention in deer mice, but studies from other rodents suggest that aerobic endurance is influenced by a number of factors including muscle fiber composition and respiratory capacity (Hoppeler *et al*, 1973; Hoppeler and Lindstedt, 1985; Kraemer *et al*, 1995), mitochondrial density and function (Holloszy and Coyle, 1984; Hoppeler and Lindstedt, 1985; Chow *et al*, 2007), decreased rates of glucose and glycogen utilization (Holloszy and Coyle, 1984) and increased rates of lipid oxidation (Holloszy and Coyle, 1984; Bjorntorp, 1991;

McClelland *et al*, 1994; Henriksson and Hickner, 1996; Bangsbo *et al*, 2006; Weber, 2011). All of these traits are highly plastic. Although these muscular phenotypes may enhance shivering endurance, rodents also rely heavily on non-shivering thermogenesis to regulate body temperature. Brown adipose tissue (BAT) is the primary site of non-shivering thermogenesis, and the mass of BAT depots in rodents is known to decrease dramatically with warm acclimation and seasonal acclimatization (Didow and Hayward, 1969; Himms-Hagen, 1985; Rafael *et al*, 1985; Klaus *et al*, 1988; Cannon and Nedergaard, 2004). Regression of BAT depots over the course of the 6-wk deacclimation period and the concomitant decrease in nonshivering thermogenic capacities could lead to an increased reliance on shivering thermogenesis in the warm-acclimated mice. An increased reliance on shivering thermogenesis would not only reduce total thermogenic capacity, but it could also compound the effects of muscular changes associated with inactivity that decrease thermogenic endurance, and could therefore help explain the rapid reduction in thermogenic endurance in high-altitude deer mice.

Finally, variation in body mass may also have an important consequences for thermoregulatory performance. In principle, larger mice should have a thermoregulatory advantage due to their decreased surface area to volume ratio and the concomitant reduction in rates of heat loss (Bartholomew, 1968; Conley and Porter, 1986). However, variation in body mass is not sufficient to explain all observed performance differences between high- and low-altitude deer mice. First, although body mass was significantly and positively associated with thermogenic capacity, there was no relationship between body mass and endurance. Second, although body mass did not vary systematically across the treatment groups (Table 1), the highland mice always had higher thermogenic capacities (Fig. 1). Finally, we statistically controlled for the correlation between body mass and thermogenic capacity in all comparisons between highland and

lowland mice. Taken together, these results suggest that population differences in body mass do not fully account for the observed performance differences between high- and low-altitude deer mice.

Interestingly, our estimates of hypoxic thermogenic capacity were considerably lower than those reported in highland deer mice from the White Mountains of eastern California (Chappell et al. 2007). For wild-caught mice sampled and measured at 3800 m (analogous to our in-situ treatment), Chappell et al. (2007) reported an uncorrected mean  $\text{VO}_{2\text{ max}}$  of 5.87 ml/min, which is nearly twice as high as our mean  $\text{VO}_{2\text{ max}}$  for the in situ highland mice measured at 4350 m (Table 1). These apparent differences do not seem to stem from methodological differences as our studies employed highly similar protocols. It is possible that the apparent differences in thermogenic capacity could stem from differences in the test altitude (3800 m vs 4350 m), and the differences could also reflect geographic variation in thermogenic performance among *P. maniculatus* populations. Highland deer mice from the White Mountains (subspecies *P. m. sonoriensis*) are genetically distinct from the highland Colorado mice (subspecies *P. m. rufinus*) and the lowland Nebraska mice (subspecies *P. m. nebracensis*) (Gering et al. 2009). Given that these subspecies/phylogroups vary with respect to body size and many other multifactorial traits (Osgood 1909), it would not be surprising if they also varied in measures of whole-animal physiological performance such as thermogenic capacity. Detailed studies of the mechanistic underpinnings of this geographic variation in thermogenic performance is likely to be a fruitful area of future research.

Recent years have witnessed a surge of interest in studies that explore the mechanistic underpinnings of adaptive trait variation in natural populations (Dalziel et al, 2009; Storz and Wheat, 2010). Much of this work has focused on the genetic basis of adaptive traits, while mechanisms of physiological and

developmental plasticity have received less attention (but see Whitehead *et al*, 2011). Our experimental results revealed the contributions of phenotypic plasticity to observed population differences in thermogenic capacity under hypoxia, a measure of whole-organism physiological performance that has a well-documented connection to Darwinian fitness (Hayes and O'Connor, 1999). After controlling for both physiological and developmental sources of plasticity, the highland and lowland deer mice exhibited persistent differences in thermogenic capacity, suggesting that genetically based physiological differentiation between populations may reflect local adaptation to different elevational zones.

## ACKNOWLEDGMENTS

We thank M. Carling, J. Projecto-Garcia, I. Revsbech, A. Runck, and D. Tufts for assistance with fieldwork, and D Eddy, H. Hoppeler, G McClelland, G Scott, and two anonymous reviewers for helpful comments on an earlier version of the manuscript. This work was supported by grants to JFS from the National Institutes of Health/National Heart Lung and Blood Institute (R01 HL087216 and HL087216-S1) and the National Science Foundation (IOS-0949931).

## REFERENCES

- Bangsbo J, Mohr M, Poulsen A, Perez-Gomez J, Krstrup P.** (2006). Training and testing the elite athlete. *Journal of Exercise Science and Fitness* **4**, 1-14.
- Bartholomew GA** (1968). Body temperature and energy metabolism. *Animal function principles and adaptations*. ed. Gordon MS (MacMillan, New York).
- Bennett AF** (1991). The evolution of activity capacity. *Journal of Experimental Biology* **160**, 1-23.
- Bjorntorp P** (1991). Importance of fat as a support nutrient for energy:



- 417 metabolism of athletes. *Journal of Sports Sciences* **9**, 71-76.
- 418 **Cannon B, Nedergaard J** (2004). Brown adipose tissue: function and  
 419 physiological significance. *Physiological Reviews* **84**, 277-359.
- 420 **Chappell MA** (1985). Effects of ambient temperature and altitude on ventilation  
 421 and gas exchange in deer mice (*Peromyscus maniculatus*). *Journal of*  
 422 *Comparative Physiology B-Biochemical Systemic and Environmental*  
 423 *Physiology* **155**, 751-758.
- 424 **Chappell MA, Hammond KA** (2004). Maximal aerobic performance of deer mice  
 425 in combined cold and exercise challenges. *Journal of Comparative*  
 426 *Physiology B-Biochemical Systemic and Environmental Physiology* **174**,  
 427 41-48.
- 428 **Chappell MA, Hammond KA, Cardullo R, Russell G, Rezende E, Miller C**  
 429 (2007). Deer mouse aerobic performance across altitudes: effects of  
 430 developmental history and temperature acclimation. *Physiological and*  
 431 *Biochemical Zoology* **80**, 652-662.
- 432 **Chappell MA, Hayes JP, Snyder LRG** (1988). Hemoglobin polymorphisms in  
 433 deer mice (*Peromyscus maniculatus*), physiology of beta-globin variants and  
 434 alpha-globin recombinants. *Evolution* **42**, 681-688.
- 435 **Chappell MA, Snyder LRG** (1984). Biochemical and physiological correlates of  
 436 deer mouse alpha-chain hemoglobin polymorphisms. *Proceedings of the*  
 437 *National Academy of Sciences of the United States of America* **81**, 5484-  
 438 5488.
- 439 **Cheviron ZA, Bachman GC, Connaty AD, McClelland GB, Storz JF** (2012).  
 440 Regulatory changes contribute to the adaptive enhancement of  
 441 thermogenic capacity in deer mice. *Proceedings of the National Academy*  
 442 *of Science of the United States of America* **109**, 8635-8640.
- 443 **Chow LS, Greenlund LJ, Asmann YW, Short KR, McCrady SK, Levine JA et al**

- 444 (2007). Impact of endurance training on murine spontaneous activity,  
 445 muscle mitochondrial DNA abundance, gene transcripts and function.  
 446 Journal of Applied Physiology **102**, 1078-1089.
- 447 **Conley KE, Porter WP** (1986). Heat loss from deer mice (*Peromyscus*): evaluation  
 448 of seasonal limits to thermoregulation. Journal of Experimental Biology  
 449 **126**, 273-280.
- 450 **Dalziel AC, Rogers SM, Schulte PM** (2009). Linking genotypes to phenotypes  
 451 and fitness: how mechanistic biology can inform molecular ecology.  
 452 Molecular Ecology **18**, 4997-5017.
- 453 **Didow L, Hayward J** (1969). Seasonal variations in the mass and composition of  
 454 brown adipose tissue in the meadow vole, *Microtus pennsylvanicus*.  
 455 Canadian Journal of Zoology **47**, 547-555.
- 456 **Dohm MR, Hayes JP, Garland T, Jr.** (2001). The quantitative genetics of maximal  
 457 and basal rates of oxygen consumption in mice. Genetics **159**, 267-277.
- 458 **Feder ME, Bennett AF, Huey RB** (2000). Evolutionary physiology. Annual  
 459 Review of Ecology and Systematics **31**, 315-341.
- 460 **Fontanillas P, Depraz A, Giorgi MS, Perrin N** (2005). Nonshivering  
 461 thermogenesis capacity associated with mitochondrial DNA haplotypes in  
 462 the greater white-toothed shrew, *Crocidura russula*. Molecular Ecology **14**,  
 463 661-670.
- 464 **Garland T. Jr., Adolph SC** (1991). Physiological differentiation of vertebrate  
 465 populations. Annual Review of Ecology and Systematics **22**, 193-229.
- 466 **Garland T. Jr., Carter PA** (1994). Evolutionary Physiology. Annual Review of  
 467 Physiology **56**, 579-621.
- 468 **Gering EJ, Opazo JC, Storz JF** (2009) Molecular evolution of cytochrome *b* in  
 469 high- and low-altitude deer mice (genus *Peromyscus*). *Heredity*, 102: 226-  
 470 235.

- 471 **Hammond KA, Chappell MA, Kristan DM** (2002). Developmental plasticity in  
472 aerobic performance in deer mice (*Peromyscus maniculatus*). Comparative  
473 Biochemistry and Physiology, Part A **133**, 213-224.
- 474 **Hammond KA, Szewczak J, Krol E** (2001). Effects of altitude and temperature on  
475 organ phenotypic plasticity along an altitudinal gradient. Journal of  
476 Experimental Biology **204**, 1991-2000.
- 477 **Hayes JP** (1989). Altitudinal and seasonal effects on aerobic metabolism of deer  
478 mice. Journal of Comparative Physiology B-Biochemical Systemic and  
479 Environmental Physiology **159**, 453-459.
- 480 **Hayes JP, O'Connor CS** (1999). Natural selection on thermogenic capacity of  
481 high-altitude deer mice. Evolution **53**, 1280-1287.
- 482 **Henriksson J, Hickner R** (1996). Skeletal muscle adaptation to endurance  
483 training. In: MacLeod D, Maughan R, Williams C, Madeley C, Sharp J and  
484 Nutton R (eds) *Intermittent High Intensity Exercise*. (E and FN Spon,  
485 London).
- 486 **Himms-Hagen J** (1985). Brown adipose tissue metabolism and thermogenesis.  
487 Annual Review of Nutrition **5**, 69-94.
- 488 **Hock R** (1964). Physiological responses of deer mice to various native altitudes.  
489 *The Physiological Effects of High Altitude*. ed Weihe, WH. (Macmillan,  
490 New York).
- 491 **Holloszy JO, Coyle EF** (1984). Adaptations of skeletal muscle to endurance  
492 exercise and their metabolic consequences. Journal of Applied Physiology  
493 **56**, 831-838.
- 494 **Hoppeler H, Lindstedt SL** (1985). Malleability of skeletal muscle in overcoming  
495 limitations: structural elements. Journal of Experimental Biology **115**, 355-  
496 364.

- 497 **Hoppeler H, Luth H, Claassen H, Weibel ER, Howald H** (1973). The  
 498 ultrastructure of the normal human skeletal muscle. A morphometric  
 499 analysis on untrained men, women and well-trained orienteers. *Pflügers*  
 500 *Archiv : European journal of physiology* **344**, 217-232.
- 501 **Jones JK Jr., Armstrong DM, Hoffmann RS, Jones C** (1983). Mammals of the  
 502 Northern Great Plains. University of Nebraska Press: Lincoln.
- 503 **Kingslover JG, Huey RB** (1998). Selection and evolution of morphological and  
 504 physiological plasticity in thermally varying environments. *American*  
 505 *Zoologist* **38**, 545-560.
- 506 **Klaus S, Heldmaier G, Ricquier** (1988). Season acclimation of bank voles and  
 507 wood mice: nonshivering thermogenesis and thermogenic properties of  
 508 brown adipose tissue mitochondria. *Journal of Comparative Physiology B*  
 509 **158**, 157-164.
- 510 **Kraemer WJ, Patton JF, Gordon SE, Harman EA, Deschenes MR, Reynolds K et**  
 511 **al.** (1995). Compatibility of high-intensity strength and endurance training  
 512 on hormonal and skeletal muscle adaptations. *Journal of Applied*  
 513 *Physiology* **78**, 976-989.
- 514 **Lighton JRB** (2008). *Measuring Metabolic Rates: A Manual for Scientists*. (Oxford  
 515 University Press, New York).
- 516 **Liknes ET, Scott S, Swanson DL** (2002). Seasonal acclimatization in the  
 517 American Goldfinch revisited: to what extent do metabolic rates vary  
 518 seasonally. *The Condor* **104**, 548-557.
- 519 **Liknes ET, Swanson DL** (1996). Seasonal variation in cold tolerance, basal  
 520 metabolic rate, and maximal capacity for thermogenesis in White-breasted  
 521 Nuthatches (*Sitta carolinensis*) and Downy Woodpeckers (*Picoides*  
 522 *pubescens*), two unrelated arboreal temperate residents. *Journal of Avian*  
 523 *Biology* **27**, 279-288.

- McClelland GB, Zwingelstein G, Taylor CR, Weber JM (1994). Increased capacity for circulatory fatty acid transport in a highly aerobic mammal. *American Journal of Physiology* **266**, R1280-R1286.
- Merritt J (1995). Seasonal thermogenesis and changes in body mass of masked shrews, *Sorex cinereus*. *Journal of Mammalogy* **76**, 1020-1035.
- Nespolo RF, Bacigalupe LD, Bozinovic F (2003). Heritability of energetics in a wild mammal, the leaf-eared mouse (*Phyllotis darwini*). *Evolution* **57**: 1679-1688.
- Nespolo RF, Bustamante DM, Bacigalupe LD, Bozinovic F (2005). Quantitative genetics of bioenergetics and growth-related traits in the wild mammal, *Phyllotis darwini*. *Evolution* **59**, 1829-1837.
- Oelkrug R, Meyer CW, Heldmaier G, Mzilikazi N (2012). Seasonal changes in thermogenesis of a free-ranging afrotherian small mammal, the Western rock elephant shrew (*Elephantulus rupestris*). *Journal of Comparative Physiology B*.
- Osgood WH (1909) Revision of the mice of the American genus *Peromyscus*. *North American Fauna*. **28**: 1-285.
- Packard GC, Boardman TJ (1998). The misuse of ratios, indices, and percentages in ecophysiological research. *Physiological Zoology* **61**, 1-9.
- Rafael J, Vsiansky P, Heldmaier G (1985). Seasonal adaptation of brown adipose tissue in the Djungarian hamster. *Journal of Comparative Physiology B* **155**, 521-528.
- Rezende EL, Gomes FR, Malisch JL, Chappell MA, Garland T, Jr. (2006). Maximal oxygen consumption in relation to subordinate traits in lines of house mice selectively bred for high voluntary wheel running. *Journal of Applied Physiology* **101**, 477-485.
- Rezende EL, Hammond KA, Chappell MA (2009). Cold acclimation in

- 551 *Peromyscus*: individual variation and sex effects in maximum and daily  
 552 metabolism, organ mass and body composition. *Journal of Experimental*  
 553 *Biology* **212**, 2795-2802.
- 554 **Rezende EL, Silva-Duran I, Fernando Novoa F, Rosenmann M** (2001). Does  
 555 thermal history affect metabolic plasticity?: a study in three *Phyllotis*  
 556 species. *Journal of Thermal Biology* **26**, 103-108.
- 557 **Rezende EL, Chappell MA, Hammond KA** (2004). Cold-acclimation in  
 558 *Peromyscus*: temporal effects and individual variation in maximum  
 559 metabolism and ventilatory traits. *Journal of Experimental Biology* **207**,  
 560 295-305.
- 561 **Rosenmann M, Morrison P** (1974). Maximum oxygen consumption and heat loss  
 562 facilitation in small homeotherms by He-O<sub>2</sub>. *American Journal of*  
 563 *Physiology* **226**, 490-495.
- 564 **Russell GA, Chappell MA** (2007). Is BMR repeatable in deer mice? Organ mass  
 565 correlates and the effects of cold acclimation and natal altitude. *Journal of*  
 566 *Comparative Physiology B* **177**, 75-87.
- 567 **Russell GA, Rezende EL, Hammond KA** (2008). Development partly determines  
 568 the aerobic performance of adult deer mice. *Journal of Experimental*  
 569 *Biology* **211**, 35-41.
- 570 **Sadowska ET, Labocha MK, Baliga K, Stainisz AK, Wroblewska A, Jagusiak W**  
 571 **et al** (2005). Genetic correlations between basal and maximum metabolic  
 572 rates in a wild rodent: consequences for evolution of endothermy.  
 573 *Evolution* **59**, 672-681.
- 574 **Sears MW, Hayes JP, Banta MR, McCormick D** (2009). Out in the  
 575 cold: physiological capacity influences behavior in deer mice. *Functional*  
 576 *Ecology* **23**, 774-783.
- 577 **Sears MW, Hayes JP, O'Connor CS, Geluso K, Sedinger JS** (2006). Individual

- 578 variation in thermogenic capacity affects above-ground activity of high-  
 579 altitude deer mice. *Functional Ecology* **20**, 97-104.
- 580 **Snyder LRG** (1985). Low P-50 in deer mice native to high-altitude. *Journal of*  
 581 *Applied Physiology* **58**, 193-199.
- 582 **Snyder LRG, Born S, Lechner AJ** (1982). Blood oxygen affinity in high-altitude  
 583 and low-altitude populations of the deer mouse. *Respiration Physiology*  
 584 **48**, 89-105.
- 585 **Storz JF, Runck AR, Moriyama H, Weber RE, Fago A** (2010a). Genetic  
 586 differences in hemoglobin function between highland and lowland deer  
 587 mice. *Journal of Experimental Biology* **213**, 2565-2574.
- 588 **Storz JF, Runck AR, Sabatino SJ, Kelly JK, Ferrand N, Moriyama H et al** (2009).  
 589 Evolutionary and functional insights in the mechanism underlying high  
 590 altitude adaptation of deer mouse hemoglobin. *Proceedings of the*  
 591 *National Academy of Science* **106**, 14450-14455.
- 592 **Storz JF, Sabatino SJ, Hoffman FG, Gering EJ, Moriyama H, Ferrand N et al**  
 593 (2007). The molecular basis of high-altitude adaptation in deer mice. *PLoS*  
 594 *Genetics* **3**, 448-458.
- 595 **Storz JR, Scott GR, Cheviron ZA** (2010b). Phenotypic plasticity and genetic  
 596 adaptation to high-altitude hypoxia in vertebrates. *Journal of*  
 597 *Experimental Biology* **213**, 4125-4136.
- 598 **Storz JF, Wheat CW** (2010). Integrating evolutionary and functional approaches  
 599 to infer adaptation at specific loci. *Evolution* **64**, 2489-2509.
- 600 **Swallow JG, Garland T, Jr., Cater PA, Zhan W-Z, Sieck GC** (1998). Effects of  
 601 voluntary activity and genetic selection on aerobic capacity in house mice  
 602 (*Mus domestica*). *Journal of Applied Physiology* **84**: 69-76.
- 603 **Swanson DL** (2001). Are summit metabolism and thermogenic endurance

correlated in winter-acclimatized passerine birds? Journal of Comparative Physiology B-Biochemical Systemic and Environmental Physiology **171**, 475-481.

**Swanson DL** (2007). Cold hardiness and summit metabolism in North American kinglets during fall migration. Acta Zoologica Sinica **53**, 600-606.

**Swanson DL** (2010). Seasonal metabolic variation in birds: functional and mechanistic correlates. Current Ornithology **17**, 75-129.

**Swanson DL, Garland T, Jr.** (2009). The evolution of high summit metabolism and cold tolerance in birds and its impact on present-day distributions. Evolution **63**, 184-194.

**Swanson DL, Liknes ET** (2006). A comparative analysis of thermogenic capacity and cold tolerance in small birds. Journal of Experimental Biology **209**, 466-474.

**Van Sant MJ, Hammond KA** (2008). Contribution of shivering and nonshivering thermogenesis to thermogenic capacity for the deer mouse (*Peromyscus maniculatus*). Physiological and Biochemical Zoology **81**, 605-611.

**Ward M, Milledge J, West J** (1995). *High altitude physiology and medicine*. (Chapman Hall Medical, London).

**Weber JM** (2011). Metabolic fuels: regulating fluxes to select mix. Journal of Experimental Biology **214**, 286-294.

**Whitehead A, Roach JL, Zhang S, Galvez F** (2011). Genomic mechanisms of evolved physiological plasticity in killifish distributed along and environmental salinity gradient. Proceedings of the National Academy of Science **108**, 6193-6198.

**Wone B, Sears MW, Labocha MK, Donovan ER, Hayes JP** (2009). Genetic variances and covariances of aerobic metabolic rates in laboratory mice. Proceedings of the Royal Society, B **276**, 3695-3704.



631  
632  
633  
634  
635  
636  
637  
638  
639  
640  
641  
642  
643  
644  
645  
646  
647  
648  
649  
650  
651  
652

**Figure Legends**

**Fig 1.** A.) Mass-specific maximum rates of oxygen consumption ( $VO_{2\max}$ ) under hypoxic cold stress for highland (black symbols) and lowland (gray symbols) deer mice across three treatments. Letters denote population and treatment combinations that are significantly different from one another. Data are presented as means  $\pm$  1 SEM. B.) The proportional difference in  $VO_{2\max}$  between highland and lowland deer mice across treatments.

**Fig 2.** A.) Thermogenic endurance [length of time (min) that individuals maintained  $\geq 90\%$  of  $VO_{2\max}$ ] under hypoxic cold stress for highland (black symbols) and lowland (gray symbols) deer mice across three treatments. Letters denote population and treatment combinations that are significantly different from one another. Data are presented as means  $\pm$  1 SEM. B.) The proportional difference in thermogenic endurance between highland and lowland deer mice across treatments.

**Fig 3.** Correlations between thermogenic endurance and  $VO_{2\max}$  across three treatments. Black and gray symbols represent highland and lowland deer mice respectively.

Fig 1

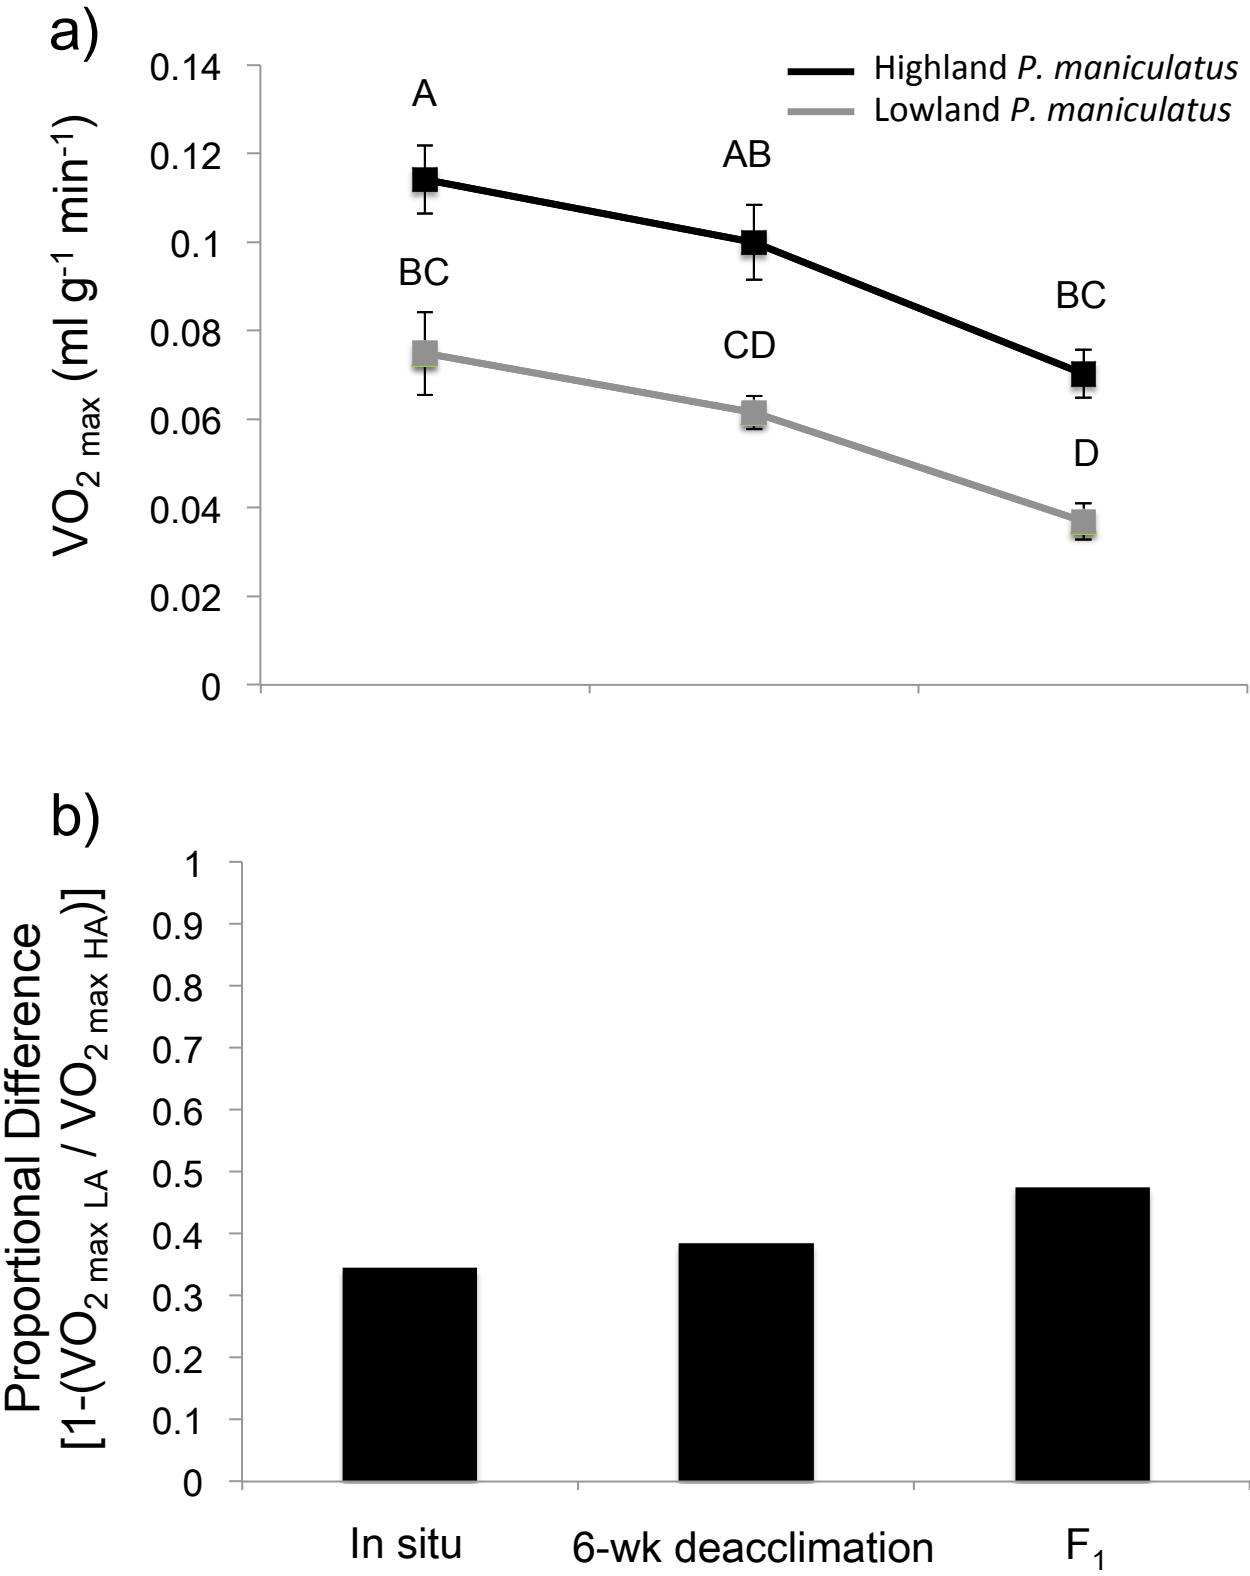

Fig 2

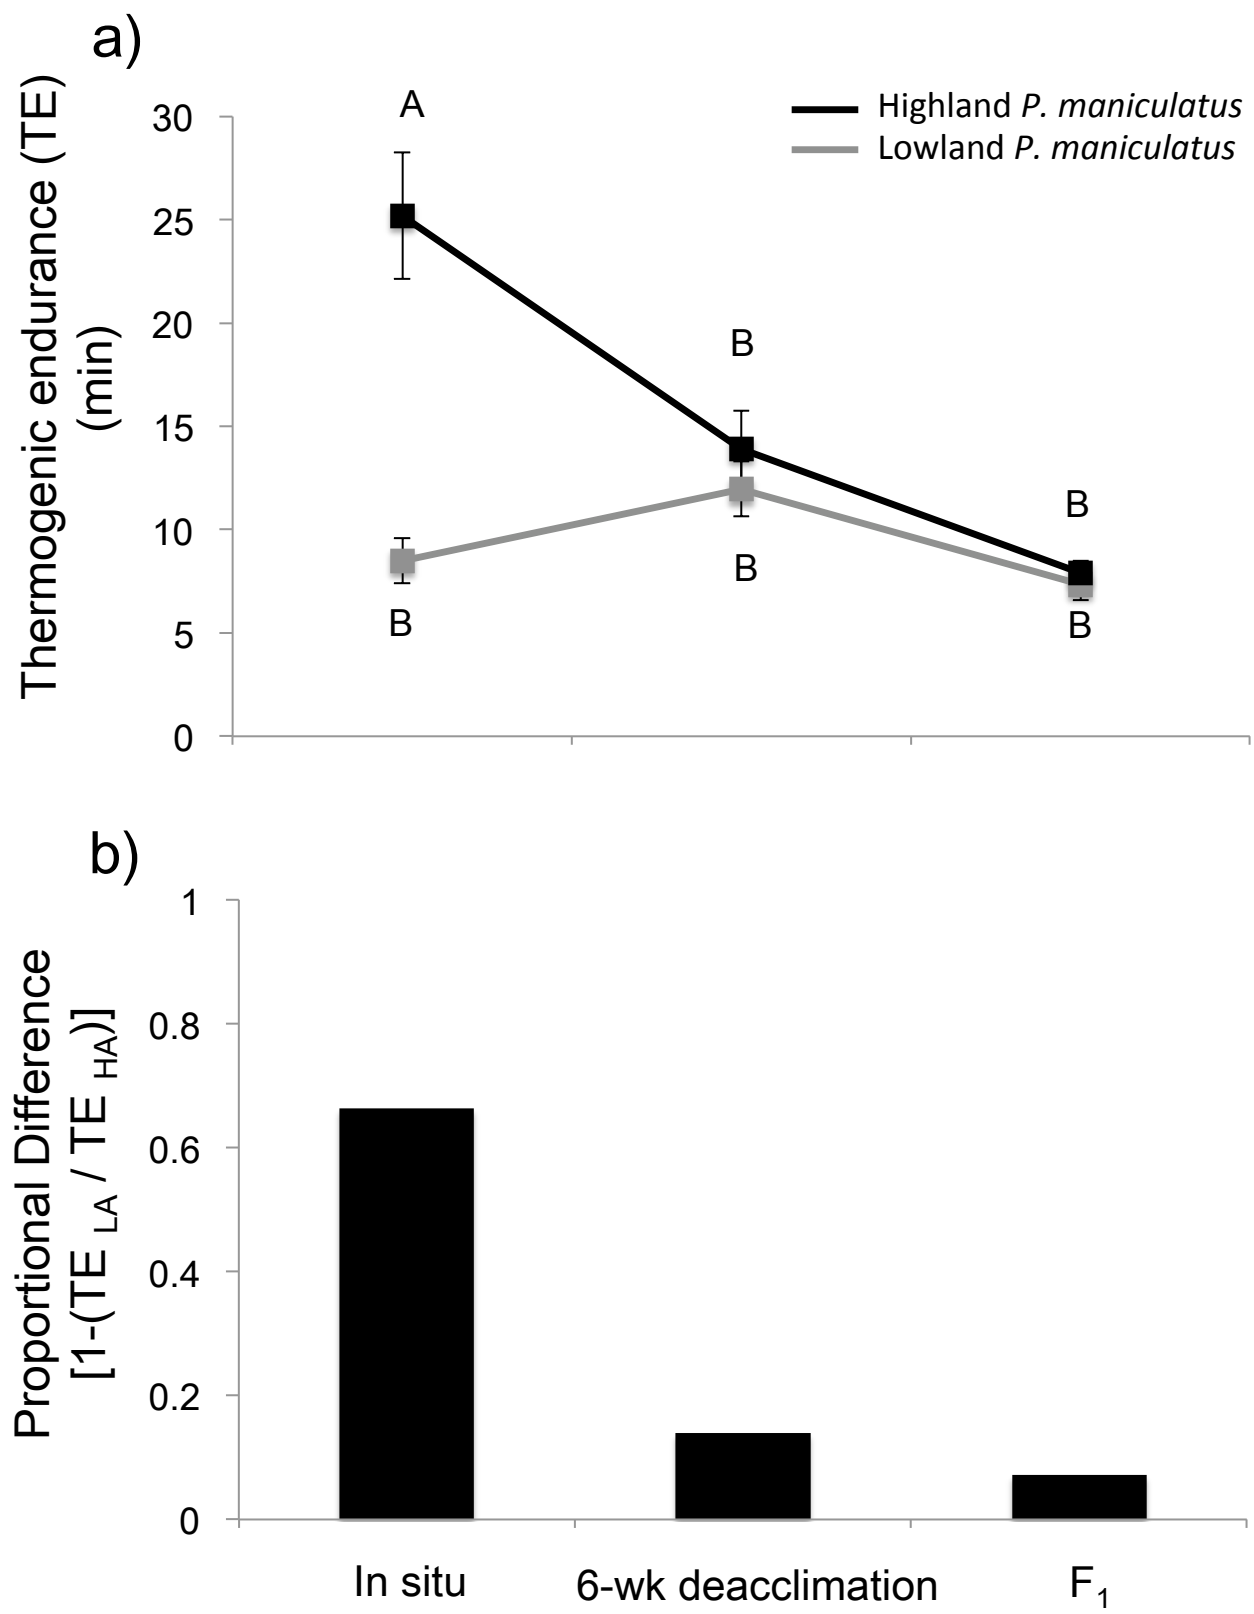

Fig 3

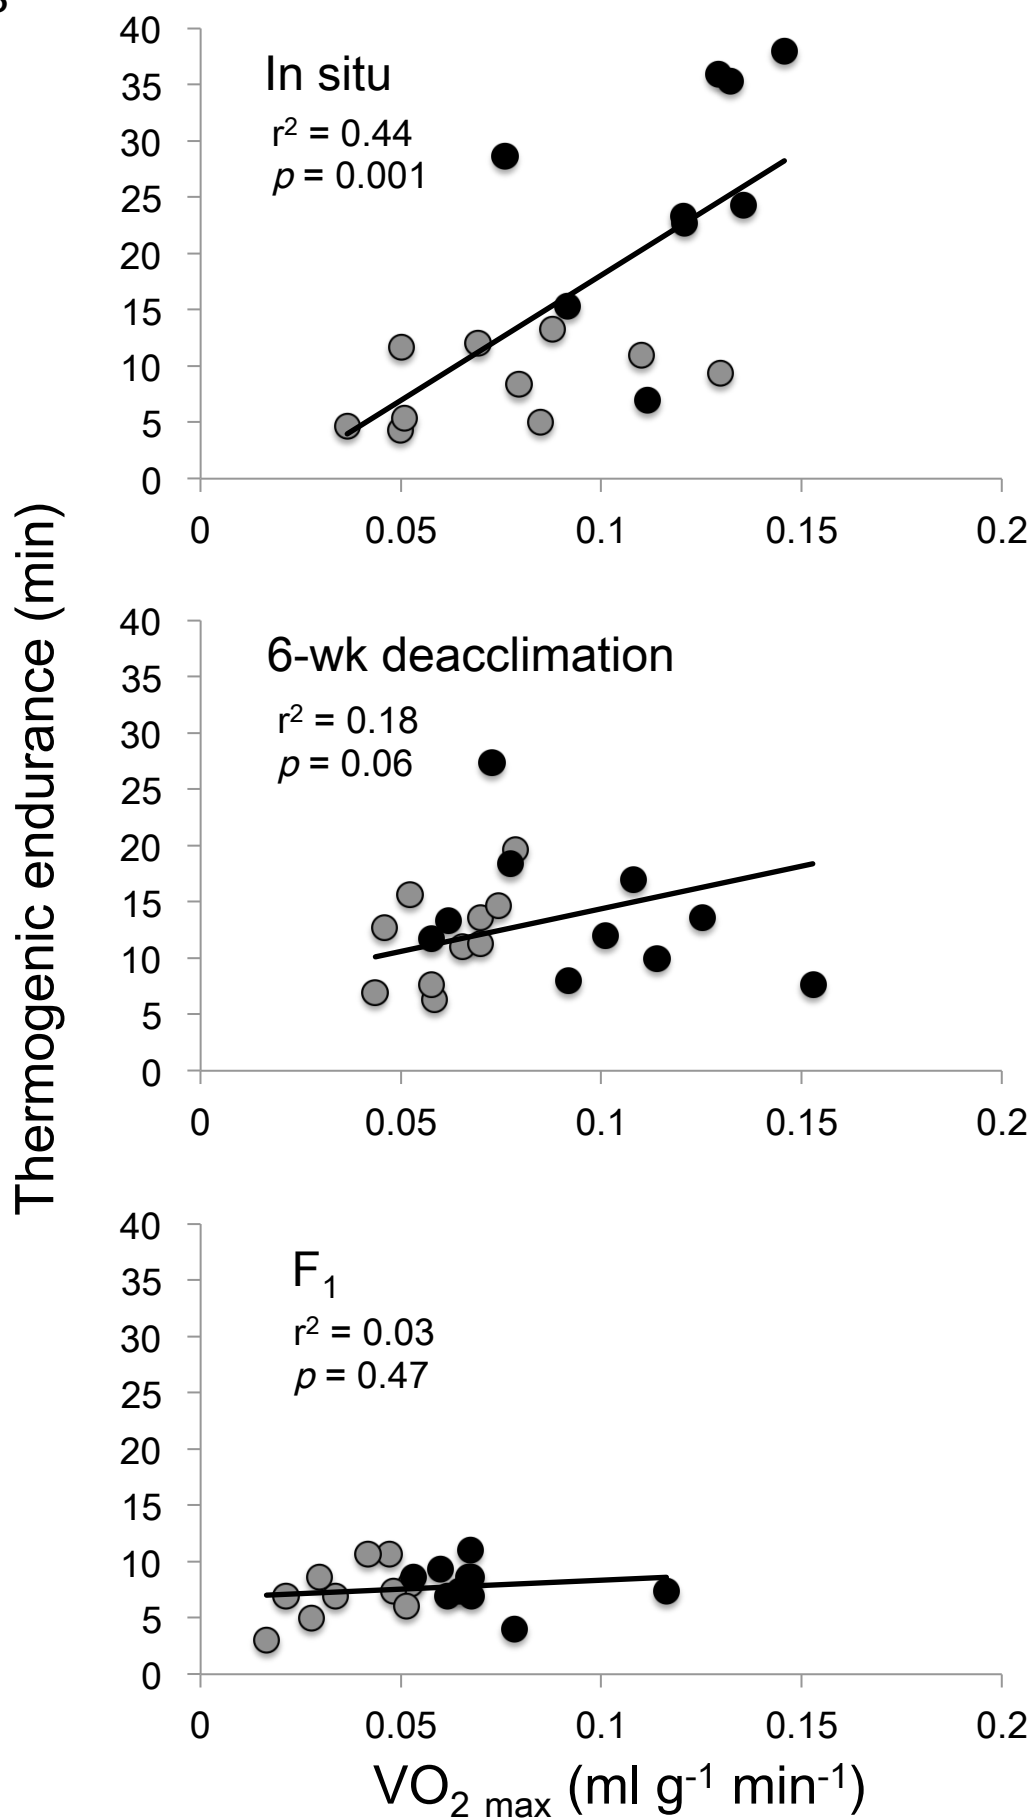

**Table 1.** Altitudinal variation in body mass (g) across three treatments. HA = high-altitude; LA = low-altitude. Letters denote population and treatment combinations that are significantly different from one another (Two-way ANOVA followed by *post-hoc* Tukey HSD tests).

| Population | Treatment          | Mean                   | SE   |
|------------|--------------------|------------------------|------|
| HA         | <i>In situ</i>     | 21.46 <sup>A,B</sup>   | 0.91 |
| HA         | 6-wk deacclimation | 21.01 <sup>A,B,C</sup> | 1.04 |
| HA         | F <sub>1</sub>     | 18.34 <sup>B,C</sup>   | 0.64 |
| LA         | <i>In situ</i>     | 17.38 <sup>C</sup>     | 0.80 |
| LA         | 6-wk deacclimation | 17.71 <sup>B,C</sup>   | 0.85 |
| LA         | F <sub>1</sub>     | 22.91 <sup>A</sup>     | 1.16 |

**Table 2.** Effects of population of origin (high-altitude vs. low-altitude), and treatment (*in situ*, 6-wk deacclimation, and F<sub>1</sub> progeny of deacclimated mice) on body mass (g).

| Factor               | df | F     | p                     |
|----------------------|----|-------|-----------------------|
| Population           | 1  | 1.57  | 0.2151                |
| Treatment            | 2  | 1.21  | 0.3038                |
| Population*Treatment | 2  | 12.69 | 1.55x10 <sup>-5</sup> |

**Table 3.** Effects of body mass (g), population of origin (high-altitude vs. low-altitude), and treatment (*in situ*, 6-wk deacclimation, and F<sub>1</sub> progeny of deacclimated mice) on thermogenic capacity (VO<sub>2 max</sub>; ml O<sub>2</sub>\*min<sup>-1</sup>). Tests of population of origin and treatment were performed using an ANCOVA model with body mass as a covariate

| Factor                 | Df | F     | <i>P</i>                 |
|------------------------|----|-------|--------------------------|
| Mass                   | 1  | 13.77 | 0.0005                   |
| Population             | 1  | 60.17 | 2.74 × 10 <sup>-10</sup> |
| Treatment              | 2  | 21.46 | 1.49 × 10 <sup>-10</sup> |
| Population x Treatment | 2  | 0.59  | 0.56                     |

**Table 4.** Effects of population of origin (high-altitude vs. low-altitude) and treatment (in situ, 6-week acclimation, and F<sub>1</sub> progeny of deacclimated mice) on thermogenic endurance [length of time (min) that individuals maintained  $\geq 90\%$  of VO<sub>2 max</sub>].

| Factor                 | Df | F     | <i>P</i>                |
|------------------------|----|-------|-------------------------|
| Population             | 1  | 22.03 | 1.87 x 10 <sup>-5</sup> |
| Treatment              | 2  | 15.40 | 5.10 x 10 <sup>-6</sup> |
| Population X Treatment | 2  | 14.36 | 1.00 x 10 <sup>-5</sup> |
